# Supplementary material
Source: Springer Nature journal article supplement (https://www.springermedizin.de/resource/supplementary/13054_2012_1078_MOESM2_ESM.pdf/9711130)
Supplement: MOESM2 [file 9711130]

**3775 patients screened**  
during the study period

3026 patients excluded:  
2405 pts ICU length of stay < 48 hours  
87 pts no close proxy  
98 family/pts refused informed consent  
186 pts re-admission  
12 pts not speaking sufficient Dutch  
73 pts cognitive impairment  
(mentally impairment, dementia)  
20 pts transferred to another hospital  
145 pts due to investigator absence

N= 172 included  
with AKI

N=577 included  
without AKI

61 pts died during ICU  
12 pts lost to follow up  
(neurological impairment i.e.  
delirium)

71 pts died during ICU  
32 pts transferred to other  
hospital, 26 pts neurological  
impairment i.e. delirium

N= 99  
discharged from the ICU

N=448  
discharged from the ICU

12 pts died in ward  
8 pts lost to follow up  
(neurological impairment i.e.  
long-term delirium)

61 pts died in ward  
20 pts lost to follow up  
(neurological impairment i.e.  
long-term delirium)

N= 79  
discharged from the  
hospital

N=367  
discharged from the  
hospital

5 pts died at 3 months

25 pts died at 3 months  
4 pts lost to follow up

N= 74  
follow up at 3 months  
after ICU discharge

N=338  
follow up at 3 months  
after ICU discharge

1 pts died at 6 months

11 pts died at 6 months  
2 pt lost to follow up

N= 73  
follow up at 6 months  
after ICU discharge

N=325  
follow up at 6 months  
after ICU discharge
